# Supplementary material for: Effect of myeloperoxidase oxidation and N-homocysteinylation of high-density lipoprotein on endothelial repair function
Source: publisher site journal article supplement (doi:10.1515/hsz-2021-0247), 2021-08-25
Supplement: Supplementary file 1 [file j_hsz-2021-0247_suppl.pdf]

## Effect of myeloperoxidase oxidation and *N*-homocysteinylation of high-density lipoprotein on endothelial repair function

Takahiro Kameda, Yuna Horiuchi, Shitsuko Shimano, Kouji Yano, Shao-Jui Lai, Naoya Ichimura, Shuji Tohda, Yuriko Kurihara, Minoru Tozuka and Ryunosuke Ohkawa

### Supplementary material

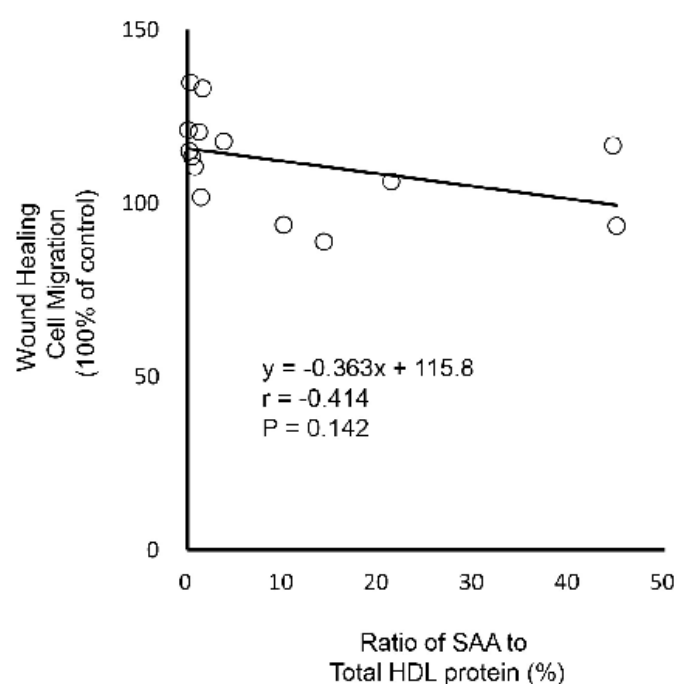

**Supplementary Figure 1:** Relationship between HDL EC repair function and SAA or troponin I levels. HDL from the patient and healthy subject plasmas was analyzed by SDS-PAGE with CBB-R250 staining. The relative amount of SAA to total HDL protein was quantified with CS Analyzer4. Correlation coefficient between wound healing cell migration and the ratio of SAA to total HDL protein was described in Figure ( $n = 14$ ).
